# Supplementary material for: Oft zu spät erkannt: Eierstockkrebs
Source: Springer Nature journal article supplement (doi:10.1007/s00058-023-3184-y), 2023-11-01
Supplement: MOESM1 [file 26254000]

## Literatur, Quellen

**zum Beitrag „Oft zu spät erkannt: Eierstockkrebs“  
von Elisabeth Höwler**

*Heilberufe (75) 11/2023, S. 10-13*

Internetadressen: [www.krebsgesellschaft.de](http://www.krebsgesellschaft.de)

Deutsche Krebsgesellschaft e.V., Stiftung Deutsche Krebshilfe (Mai 2022): [S3-Leitlinie Diagnostik, Therapie und Nachsorge maligner Ovarialtumoren \(Version 5.1\)](#)

Laubenstein, Peter (2022) Leben mit Krebs: Fallstricke, Stolpersteine und Tretminen.  
tredition GmbH Hamburg
